# Supplementary material
Source: PubMed Central journal article supplement (PMC2770758)
Supplement: 00152.2009_1.pdf [file 00152.2009_1.pdf]

Cardiac Calcineurin Deficiency

Supplemental Table 1. Sequences of mouse primers/probes used in real-time qPCR.

|                                   |                                  |                                                                                                            |
|-----------------------------------|----------------------------------|------------------------------------------------------------------------------------------------------------|
| Calsequestrin (Casq2)             | FWD primer<br>RV primer<br>Probe | 5'- CATCCCTAACAAACCGTACACAGA-3'<br>5'- CGATGTGGATCCCATTC AAGT -3'<br>5'- AGCTTGTGGAGTTTGTGAAGGAACATCAA -3' |
| Cytochrome C (Cycs)               | FWD primer<br>RV primer<br>Probe | 5'-ACCAAATCTCCACGGTCTGTT-3'<br>5'-GGATTCTCCAAATACTCCATCAG-3'<br>5'-ACAGATGCCAACAAGAACAAGGCAT-3'            |
| ATP Synthase Beta subunit (Atp5b) | FWD primer<br>RV primer<br>Probe | 5'-CGTGAGGGCAATGATTTATACCAT-3'<br>5'-TCCTGGTCTCTGAAGTATTCAGCAA-3'<br>5'-ACCAACGCTACCTTGG AAGTGGCATCT-3'    |
| Nppa (ANF)                        | FWD primer<br>RV primer<br>Probe | 5'-AGTGC GGTGTCCAACACAGA-3'<br>5'-GACCTCATCTTCTACCGGCATCT-3'<br>5'-TCAAGAACCTGCTAGACCTGGAGGAG-3'           |
| Nppb (BNP)                        | FWD primer<br>RV primer<br>Probe | 5'-GCTGCTTTGGGCACAAGATAG-3'<br>5'-GCAGCCAGGAGGTCTTCCTA-3'<br>5'-CAGTGCGTTACAGCCCAAACGA-3'                  |
| Phospholamban (Pln)               | FWD primer<br>RV primer<br>Probe | 5'-CAGCTTCATGCTCTGCACTGT- 3'<br>5'-GCCAAATGTGAGCTGTCTTCT -3'<br>5'-ATCACCGAAGCCAAGGTCTCCTAA -3'            |
| Atp2a2 (SERCA2a)                  | FWD primer<br>RV primer<br>Probe | 5'-GGAGATGCACCTGGAAGACT-3'<br>5'-CCACACAGCCGACGAAA-3'<br>5'-TTCATCAAATACGAGACCAACCTGACT-3'                 |
| L-type Calcium Channel (Cacna1c)  | FWD primer<br>RV primer          | 5'-GGAGGACAAGAGGGAGATCCA- 3'<br>5'-GGAGGCCCTTCGACCTAGAG-3'                                                 |
| Na-Ca Exchanger (Slc8a1)          | FWD primer<br>RV primer          | 5'-CCATCTTCGGAATGTCAATG- 3'<br>5'-GCCTTTTTGGTCTTTATTTC -3'                                                 |
| 36B4                              | FWD primer<br>RV primer          | 5'-ATCCCTGACGCACCGCCGTGA-3'<br>5'-TGCATCTGCTTGGAGCCCACGTT-3'                                               |

Probes are 5'-FAM and 3'-TAMRA modified

## Cardiac Calcineurin Deficiency

Supplemental Table 2. Results of Echocardiographic analysis of *csCnb1*<sup>-/-</sup> and mice at 1 and 4 months of age.

|            | ONE MONTH                        |                                  | FOUR MONTH                       |                                  |
|------------|----------------------------------|----------------------------------|----------------------------------|----------------------------------|
|            | <i>csCnb1</i> <sup>+/+</sup> (4) | <i>csCnb1</i> <sup>-/-</sup> (5) | <i>csCnb1</i> <sup>+/+</sup> (4) | <i>csCnb1</i> <sup>-/-</sup> (4) |
| HR (bpm)   | 677 ± 30                         | 726 ± 36                         | 724 ± 50                         | 576 ± 48                         |
| LVPWd (mm) | 0.64 ± 0.01                      | 0.59 ± 0.03                      | 0.67 ± 0.02                      | 0.62 ± 0.04                      |
| IVSd (mm)  | 0.69 ± 0.01                      | 0.64 ± 0.02                      | 0.79 ± 0.05                      | 0.66 ± 0.04                      |
| LVIDd (mm) | 3.11 ± 0.06                      | 3.32 ± 0.09                      | 2.98 ± 0.10                      | 3.36 ± 0.32                      |
| LVPWs (mm) | 1.33 ± 0.06                      | 0.96 ± 0.08*                     | 1.41 ± 0.02                      | 0.96 ± 0.07*                     |
| IVSs (mm)  | 1.41 ± 0.08                      | 1.04 ± 0.05*                     | 1.59 ± 0.12                      | 1.08 ± 0.05*                     |
| LVIDs (mm) | 1.14 ± 0.09                      | 2.05 ± 0.12*                     | 1.07 ± 0.07                      | 2.37 ± 0.24*                     |
| RWT        | 0.43 ± 0.01                      | 0.37 ± 0.01*                     | 0.49 ± 0.03                      | 0.39 ± 0.05                      |
| FS (%)     | 63.3 ± 2.6                       | 38.3 ± 2.1*                      | 64.1 ± 1.5                       | 29.5 ± 2.0*                      |

Values represent mean ± SEM. Data were analyzed by ANOVA followed by the Tukey test. Abbreviations: HR, heart rate; LVPWd, left ventricle (LV) posterior wall thickness, diastole; IVSd, intraventricular septum thickness, diastole; LVIDd, LV internal dimension, diastole; LVPWs, LV posterior wall thickness, systole; IVSs, intraventricular septum thickness, systole; LVIDs, LV internal dimension, systole; RWT, relative wall thickness [(LVPWd+IVSd)/LVIDd]; and FS, fractional shortening [((LVIDd-LVIDs)/LVIDd) x 100]. \*P<0.05 compared with age-matched controls.

## Cardiac Calcineurin Deficiency

Supplemental Table 3. Doppler measurements of transmitral flow in 4 month old csCnbl<sup>+/+</sup> and csCnbl<sup>-/-</sup> mice.

|            | csCnbl <sup>+/+</sup> (n=4) | csCnbl <sup>-/-</sup> (n=4) |
|------------|-----------------------------|-----------------------------|
| E          | 1.00 ± 0.04                 | 1.02 ± 0.06                 |
| DT         | 25 ± 1.1                    | 12 ± 1.1*                   |
| IVRT       | 13 ± 0.5                    | 17 ± 0.7*                   |
| Ea         | 0.054 ± 0.002               | 0.037 ± 0.002*              |
| E/Ea       | 18.6 ± 0.7                  | 27.2 ± 0.2*                 |
| Sa         | 0.041 ± 0.01                | 0.025 ± 0.01*               |
| PW (syst)  | 0.046 ± 0.001               | 0.025 ± 0.001*              |
| PW (diast) | 0.051 ± 0.002               | 0.037 ± 0.001*              |

Results of echocardiographic Doppler studies performed on csCnbl<sup>+/+</sup> and csCnbl<sup>-/-</sup> mice at 4 months of age. Values represent mean ± SEM. Data were analyzed using the t-test. Abbreviations: E, Peak trans-mitral E velocity; DT, deceleration time of E; IVRT, Isovolumic relaxation time; Ea, Peak velocity of early diastolic mitral annular velocity; Sa, Peak velocity of systolic mitral annular velocity; PW (syst), Posterior wall rate of thickening; PW (diast), Posterior wall rate of thinning. \*P<0.05 compared with age-matched controls.
